# Supplementary material
Source: PubMed Central journal article supplement (PMC6016785)
Supplement: pnas.1803733115.sapp.pdf [file pnas.1803733115.sapp.pdf]

## Supporting Information

### **Distinguishing Malignant from Benign Microscopic Skin Lesions Using Desorption Electrospray Ionization Mass Spectrometry Imaging**

Katherine Margulis<sup>a</sup>, Albert S. Chiou<sup>b</sup>, Sumaira Z. Aasi<sup>b</sup>, Robert J. Tibshirani<sup>c,d</sup>, Jean Y. Tang<sup>b</sup>,  
and Richard N. Zare<sup>a,1</sup>

<sup>a</sup>Department of Chemistry, Stanford University, Stanford, CA, 94305;

<sup>b</sup>Department of Dermatology Stanford University School of Medicine, Stanford, CA, 94305;

<sup>c</sup>Department of Statistics, Stanford University, Stanford, CA, 94305

<sup>d</sup>Department of Biomedical Data Sciences, Stanford University, Stanford, CA, 94305

<sup>1</sup>To whom correspondence should be addressed. Email: zare@stanford.edu

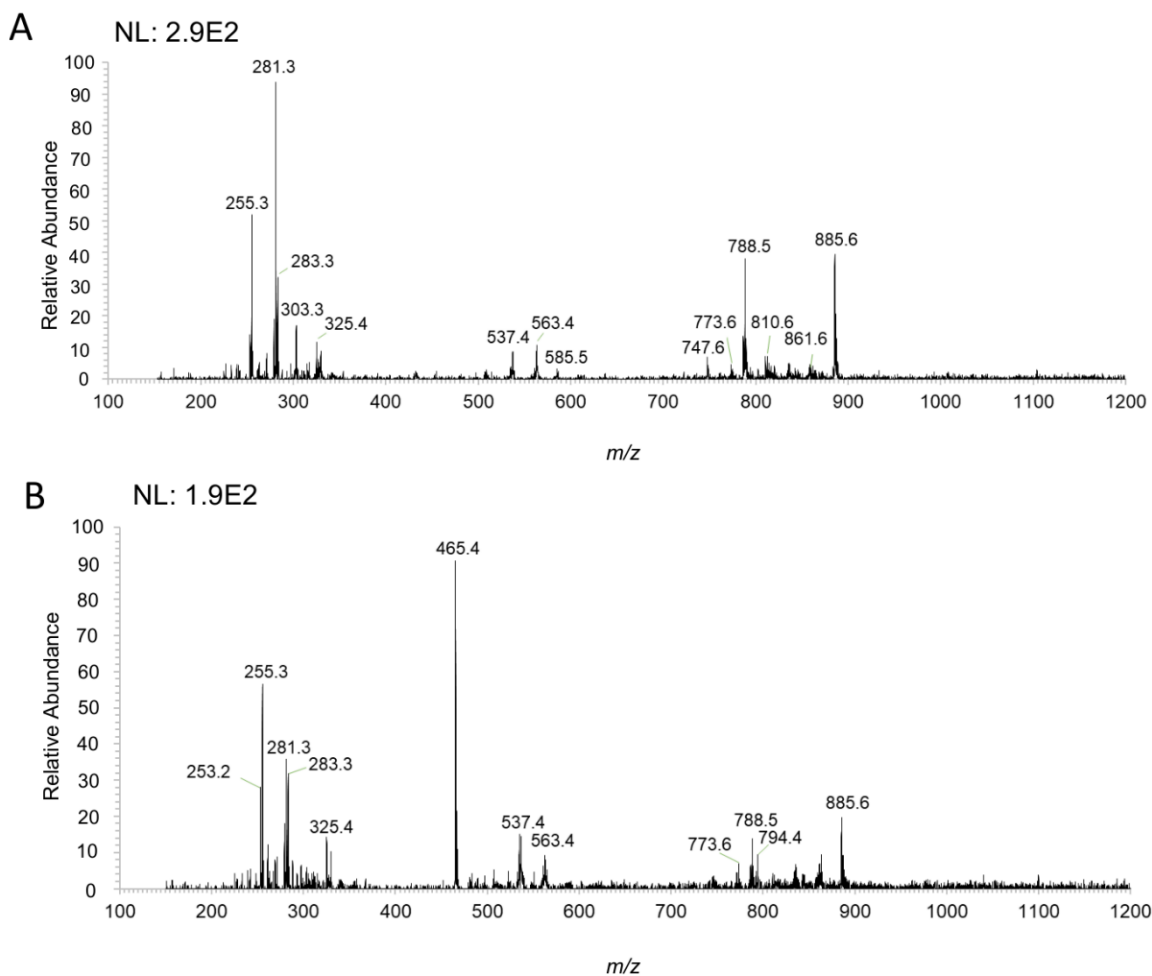

**Figure S1. Representative negative mode desorption electrospray ionization mass spectrometry (DESI-MS) imaging mass spectra obtained from skin biopsy. (A) Nodular BCC aggregate from specimen #15-1372 (mass spectral average from 4 adjacent pixels). (B) Adjacent normal skin from specimen #15-1372 (mass spectral average from 16 adjacent pixels).**

**Table S1.** High mass resolution, isotopic distribution and tandem mass spectrometry data used for identification of molecular ions.

| Measured <i>m/z</i> | High mass resolution <i>m/z</i> <sup>[a]</sup> | Main Fragment Ions                | Selected Isotopic peaks <sup>[b]</sup> | Tentative ion attribution <sup>[c]</sup> | Exact <i>m/z</i> | Mass error (ppm) | Proposed ion formula <sup>[d]</sup>                 |
|---------------------|------------------------------------------------|-----------------------------------|----------------------------------------|------------------------------------------|------------------|------------------|-----------------------------------------------------|
| 115.0               | 115.0031                                       | 71.01                             |                                        | Fumaric acid                             | 115.0031         | 0                | C <sub>4</sub> H <sub>3</sub> O <sub>4</sub>        |
| 253.2               | 253.2163                                       | 235.21                            |                                        | FA(16:1)                                 | 253.2168         | -2.0             | C <sub>16</sub> H <sub>29</sub> O <sub>2</sub>      |
| 255.3               | 255.2321                                       | 237.22                            |                                        | FA(16:0)                                 | 255.2324         | -1.2             | C <sub>16</sub> H <sub>31</sub> O <sub>2</sub>      |
| 281.3               | 281.2475                                       | 263.24                            |                                        | FA(18:1)                                 | 281.2481         | -2.1             | C <sub>18</sub> H <sub>33</sub> O <sub>2</sub>      |
| 283.3               | 283.2635                                       | 265.25                            |                                        | FA(18:0)                                 | 283.2637         | -0.7             | C <sub>18</sub> H <sub>35</sub> O <sub>2</sub>      |
| 303.3               | 303.2323                                       | 259.24, 285.22                    |                                        | FA(20:4)                                 | 303.2324         | -0.3             | C <sub>20</sub> H <sub>31</sub> O <sub>2</sub>      |
| 465.4               | 465.3036                                       | --                                | 467.2993<br>( <sup>34</sup> S)         | Cholesterol sulfate                      | 465.3039         | -0.6             | C <sub>27</sub> H <sub>45</sub> O <sub>4</sub> S    |
| 537.4               | 537.4875                                       | --                                |                                        | Dimer<br>[FA(18:1)+<br>FA(16:0)]         | 537.4883         | -1.48            | C <sub>34</sub> H <sub>65</sub> O <sub>4</sub>      |
| 563.5               | 563.5026                                       | --                                |                                        | Dimer<br>[FA(18:1)+<br>FA(18:1)]         | 563.5039         | -2.3             | C <sub>36</sub> H <sub>67</sub> O <sub>4</sub>      |
| 585.5               | 585.4867                                       | --                                |                                        | Dimer<br>[FA(18:1)+<br>FA(20:4)]         | 585.4883         | -2.7             | C <sub>38</sub> H <sub>65</sub> O <sub>4</sub>      |
| 747.6               | 747.5156                                       | 483.27, 391.22,<br>281.25, 255.23 |                                        | PG(16:0/18:1)                            | 747.5176         | -2.7             | C <sub>40</sub> H <sub>76</sub> O <sub>10</sub> P   |
| 773.6               | 773.5315                                       | 509.29, 417.24,<br>281.25         |                                        | PG(18:1/18:1)                            | 773.5333         | -2.3             | C <sub>42</sub> H <sub>78</sub> O <sub>10</sub> P   |
| 788.5               | 788.5421                                       | 701.51, 419.25,<br>281.25, 283.27 |                                        | PS(18:1/18:0)                            | 788.5442         | -2.7             | C <sub>42</sub> H <sub>79</sub> NO <sub>10</sub> P  |
| 792.4               | 792.5306                                       | 506.32, 281.25,<br>253.22         | 794.5269<br>( <sup>37</sup> Cl)        | PC(18:1/16:1)                            | 792.5310         | -0.5             | C <sub>42</sub> H <sub>80</sub> NO <sub>8</sub> PCl |

|       |          |                                                                 |                                 |               |          |      |                                                     |
|-------|----------|-----------------------------------------------------------------|---------------------------------|---------------|----------|------|-----------------------------------------------------|
| 794.4 | 794.5459 | 508.34, 283.26,<br>253.22                                       | 796.5424<br>( <sup>37</sup> Cl) | PC(18:0/16:1) | 794.5467 | -1.0 | C <sub>42</sub> H <sub>82</sub> NO <sub>8</sub> PCl |
| 810.6 | 810.5261 | 723.49, 419.25<br>303.23, 283.26                                |                                 | PS(18:0/20:4) | 810.5285 | -3.0 | C <sub>44</sub> H <sub>77</sub> NO <sub>10</sub> P  |
| 835.6 | 835.5316 | 581.31, 419.26,<br>283.26, 253.22                               |                                 | PI(16:1/18:0) | 835.5337 | -2.5 | C <sub>43</sub> H <sub>80</sub> O <sub>13</sub> P   |
| 861.6 | 861.5473 | 599.32, 581.31,<br>419.26, 283.26,<br>279.23                    |                                 | PI(18:2/18:0) | 861.5493 | -2.3 | C <sub>45</sub> H <sub>82</sub> O <sub>13</sub> P   |
| 885.6 | 885.5471 | 723.49, 599.32,<br>581.31, 439.22,<br>419.26, 303.23,<br>283.26 |                                 | PI(18:0/20:4) | 885.5493 | -2.5 | C <sub>47</sub> H <sub>82</sub> O <sub>13</sub> P   |

<sup>[a]</sup> High mass resolution analysis was performed with the Orbitrap mass analyzer.

<sup>[b]</sup> Selected isotopic peaks listed in this column are important for molecular ion characterization.

All ions have abundant isotopic peaks, such as <sup>13</sup>C peaks.

<sup>[c]</sup> FA = fatty acid, PG = glycerophosphoglycerol; PS = glycerophosphoserine; PC = glycerophosphocholine; PI = glycerophosphoinositol. (X:Y) denotes the total number of carbons and double bonds in the fatty acid chains. The most abundant isomer based on the fragments is listed.

<sup>[d]</sup> Proposed formula for the ion detected.

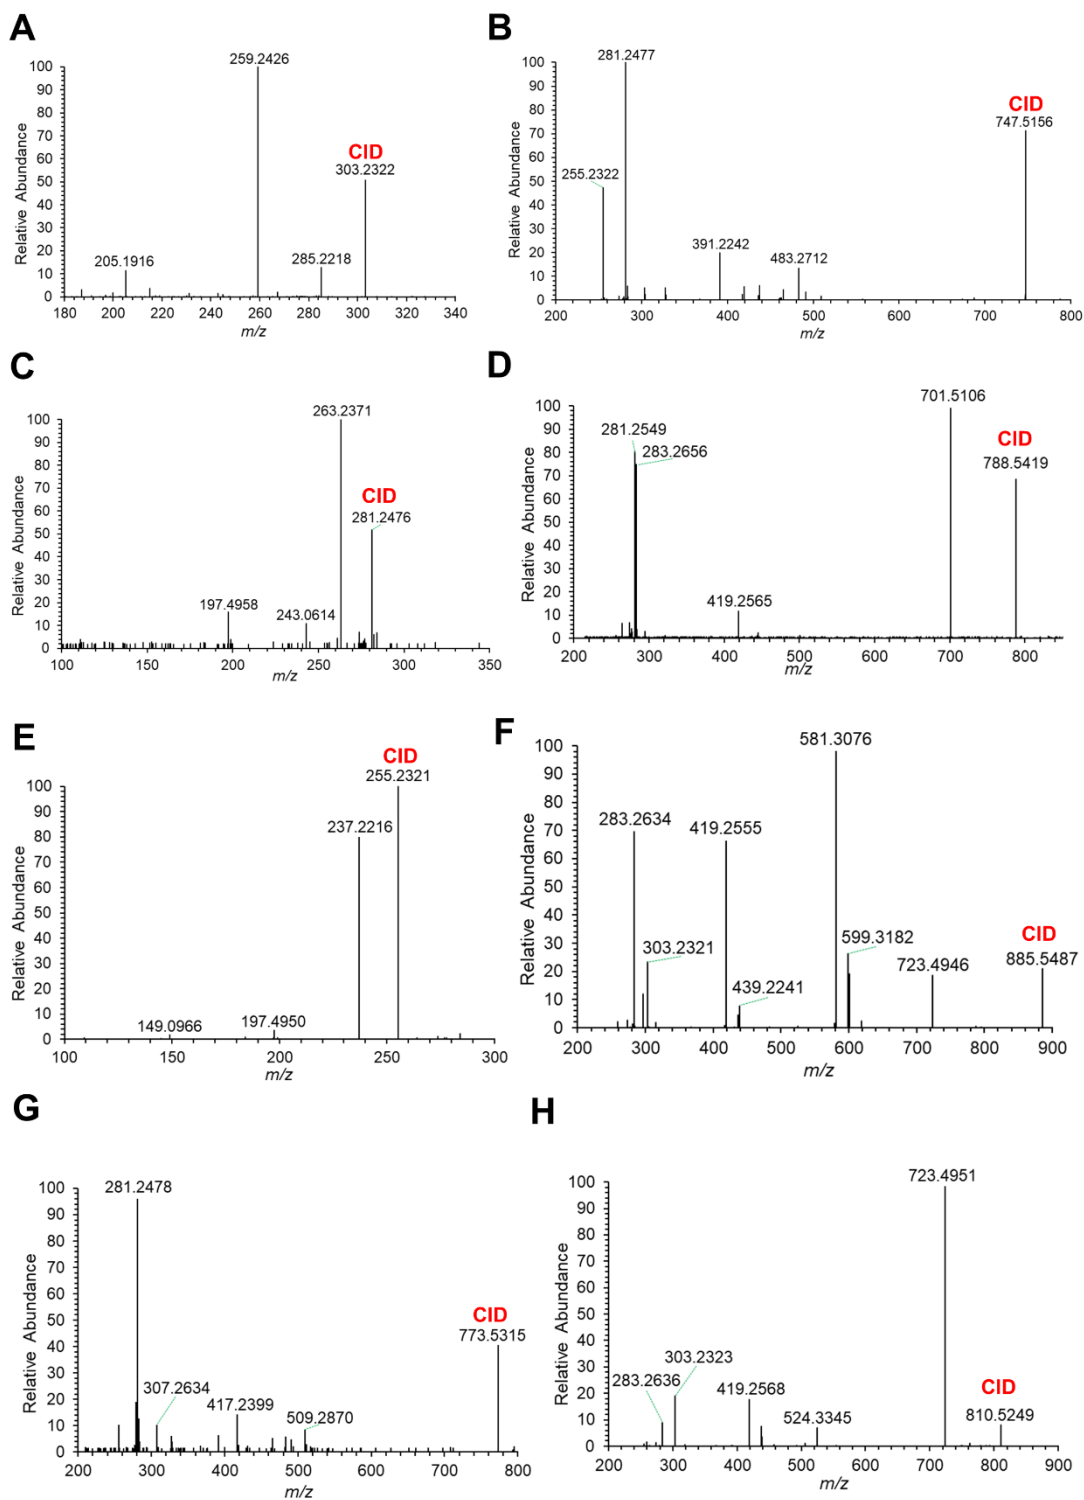

**Figure S2. Tandem MS data for identified molecular ions.** Collision induced dissociation, CID, was performed on the following molecular ions: (A) Arachidonic acid; (B) Glycerophosphoglycerol (16:0/18:1); (C) Oleic acid; (D) Glycerophosphoserine (18:1/18:0); (E) Palmitic acid; (F) Glycerophosphoinositol (18:0/20:4); (G) Glycerophosphoglycerol (18:1/18:1); (H) Glycerophosphoserine (18:0/20:4).

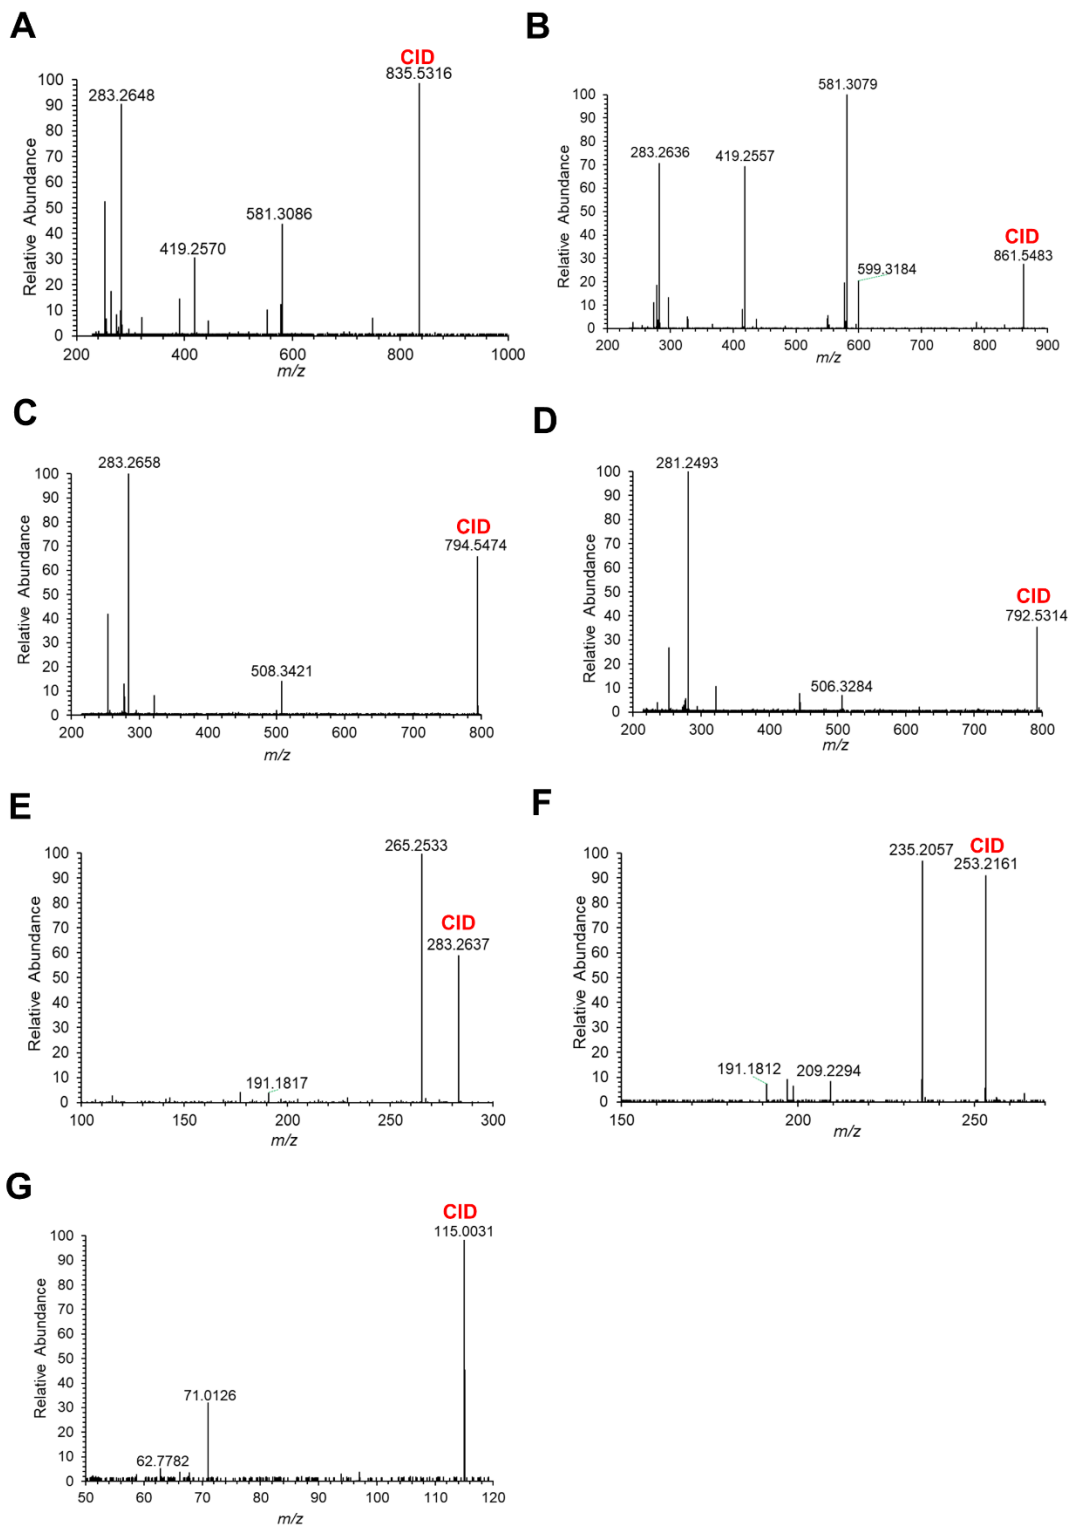

**Figure S3. Tandem MS data for identified molecular ions.** CID was performed on the following molecular ions: (A) Glycerophosphoinositol (16:1/18:0); (B) Glycerophosphoinositol (18:2/18:0); (C) Glycerophosphocholine (16:1/18:0); (D) Glycerophosphocholine (16:1/18:1); (E) Stearic acid; (F) Palmitoleic acid; (G) Fumaric acid.
